# Supplementary material for: Low infection of Phelipanche aegyptiaca in Micro-Tom mutants deficient in CAROTENOID CLEAVAGE DIOXYGENASE 8
Source: Preprints.org preprint supplement (doi:10.20944/preprints201808.0172.v1), 2018-08-08
Supplement: Supplementary file 1 [file supplementary]

**Supplementary Table S1** *SICCD8* mutant lines provided by the University of Tsukuba

| Line No. | Point mutation (nucleotide) | Point mutation (amino acid) | Recessive homozygous mutants | Number of branches | Orobanchol   | Germination assay |
|----------|-----------------------------|-----------------------------|------------------------------|--------------------|--------------|-------------------|
| WT       | –                           | –                           | –                            | 1–4                | Detected     | Germinated        |
| 7343     | G1498T                      | V206F                       | Not found                    | –                  | –            | –                 |
| 7024     | A1507T                      | T209S                       | Not found                    | –                  | –            | –                 |
| 8245     | G1624A                      | D248N                       | Found                        | 1–4                | Detected     | Germinated        |
| 7311     | G1624A                      | D248N                       | Not found                    | –                  | –            | –                 |
| 5639     | C1769T                      | P296L                       | Not found                    | –                  | –            | –                 |
| 7720     | C2122T                      | D387 =<br>Stop codon        | Not found                    | –                  | –            | –                 |
| 8940     | G2214T                      | Non-coding                  | Found                        | 1–4                | Detected     | Germinated        |
| 2481     | G2266A                      | Splice junction             | Not found                    | –                  | –            | –                 |
| 5550     | G2271A                      | G414R                       | Not found                    | –                  | –            | –                 |
| 3979     | C2302T                      | P424L                       | Not found                    | –                  | –            | –                 |
| 5291     | C2578T                      | S494F                       | Found                        | 4–7                | Not detected | Not germinated    |
| 2757     | G2616A                      | E507K                       | Found                        | 4–7                | Not detected | Not germinated    |

**Supplementary Table S2** Primers used in this study

| Primer name*                          | 5'-sequence-3'                        |
|---------------------------------------|---------------------------------------|
| <i>SICCD8</i> -TILLING F              | AACCTCATTCCACATCATGTCAC               |
| <i>SICCD8</i> -TILLING R              | TTGGAACCCAACAACCATGTAG                |
| 5291 F                                | AAGGCATGGATATGTGCAGT                  |
| 5291 R                                | TTGTTGAGAACAGGGCCAAA                  |
| 2757 F                                | AAGGTCAGCTTCTTTTCCTTAC                |
| 2757 R                                | TGTTACACCTTGTTTCAGAACAG               |
| <i>SICCD8</i> -qRT-PCR F              | AGATATGCTTATGCTTGTGGTGCTA             |
| <i>SICCD8</i> -qRT-PCR R              | ACAGCACCTTCATCATACCAATTCT             |
| <i>SICCD8</i> -qRT-PCR TaqMan         | f-GTCCCCAACACCCTCACCAAGATTGATTTAT-t** |
| <i>SIEF1</i> $\alpha$ -qRT-PCR F      | CCAAGAGGCCATCAGACAAA                  |
| <i>SIEF1</i> $\alpha$ -qRT-PCR R      | AGGCTTGATCACACCAGTCTCA                |
| <i>SIEF1</i> $\alpha$ -qRT-PCR TaqMan | f-GCCCTCCGTCTTCCACTTCAG-t**           |

\*F and R indicate forward and reverse primers, respectively.

\*\*f and t in TaqMan probe sequences indicate the fluorescence labels FAM and TAMRA, respectively.
